# Supplementary material
Source: PubMed Central journal article supplement (PMC10277876)
Supplement: 00606-2022.SUPPLEMENT.pdf [file 00606-2022.SUPPLEMENT.pdf]

**Exercise responses and mental health symptoms in COVID-19 survivors with dyspnoea**

Kathryn M. Milne<sup>1,2</sup>, Juthaporn Cowan<sup>3,4,5</sup>, Michele R. Schaeffer<sup>1,6</sup>, Nha Voduc<sup>3</sup>, Vicente Corrales-Medina<sup>4</sup>, Kim L. Lavoie<sup>7,8</sup>, Julio A. Chirinos<sup>9</sup>, Joseph H. Puyat<sup>10</sup>, Sara J. Abdallah<sup>4</sup>, Jordan A. Guenette<sup>1,2,6</sup>

ONLINE SUPPLEMENT

**Supplementary Table 1.** Dyspnea descriptor questionnaire.

**DESCRIPTORS BREATHLESSNESS**

---

CIRCLE AS MANY (OR AS FEW) OF THE DESCRIPTORS THAT APPLY TO HOW YOUR BREATHING FELT RIGHT AT THE VERY END OF EXERCISE:

1. My breath does not go in all the way
  2. Breathing in requires effort
  3. I feel that I am suffocating
  4. I feel a need for more air
  5. My breathing is heavy
  6. I cannot take a deep breath in
  7. My chest feels tight
  8. My breathing requires more work
  9. I feel a hunger for more air
  10. I feel that my breathing is rapid
  11. My breathing feels shallow
  12. I feel that I am breathing more air
  13. I cannot get enough air in
  14. My breath does not go out all the way
  15. Breathing out requires more effort
-

**Supplementary Table 2.** Multiple regression results for dyspnoea intensity and unpleasantness at highest equivalent work rate.

| <b>Independent variable</b>    | <b>Coefficient</b> | <b>SE</b> | <b>P-value</b> |
|--------------------------------|--------------------|-----------|----------------|
| <b>Dyspnoea intensity</b>      |                    |           |                |
| Intercept                      | -9.913             | 5.744     | 0.123          |
| $\dot{V}O_2$ peak, % pred      | 0.019              | 0.024     | 0.441          |
| AT, % $\dot{V}O_{2predmax}$    | -0.020             | 0.048     | 0.691          |
| $\dot{V}_E/\dot{V}CO_2$ nadir  | 0.282              | 0.120     | 0.047          |
| $D_LCO$ , % pred               | 0.039              | 0.026     | 0.170          |
| HADS total                     | -0.023             | 0.061     | 0.714          |
| SGRQ total                     | 0.018              | 0.022     | 0.455          |
| PSS                            | -0.166             | 0.071     | 0.048          |
| ASI-R                          | 0.019              | 0.014     | 0.199          |
| IES-R total                    | 0.426              | 0.452     | 0.374          |
| Sex                            | -0.911             | 0.770     | 0.271          |
| Age, years                     | -0.001             | 0.030     | 0.987          |
| Smoking, pack years            | -0.073             | 0.039     | 0.100          |
| BMI, kg/m <sup>2</sup>         | 0.025              | 0.044     | 0.589          |
| <b>Dyspnoea unpleasantness</b> |                    |           |                |
| Intercept                      | -9.89              | 5.615     | 0.116          |
| $\dot{V}O_2$ peak, % pred      | 0.003              | 0.023     | 0.906          |
| AT, % $\dot{V}O_{2predmax}$    | 0.016              | 0.047     | 0.747          |
| $\dot{V}_E/\dot{V}CO_2$ nadir  | 0.305              | 0.117     | 0.032          |
| $D_LCO$ , % pred               | 0.026              | 0.025     | 0.339          |
| HADS total                     | 0.009              | 0.060     | 0.879          |
| SGRQ total                     | 0.027              | 0.022     | 0.259          |
| PSS                            | -0.096             | 0.070     | 0.204          |
| ASI-R                          | 0.012              | 0.013     | 0.404          |
| IES-R total                    | 0.142              | 0.442     | 0.756          |
| Sex                            | -0.721             | 0.753     | 0.366          |
| Age                            | -0.023             | 0.030     | 0.452          |
| Smoking, pack years            | -0.040             | 0.038     | 0.322          |
| BMI, kg/m <sup>2</sup>         | -0.005             | 0.043     | 0.915          |

Abbreviations: ASI-R, Revised Anxiety Sensitivity Index; AT, anaerobic threshold; BMI, body mass index;  $D_LCO$ , diffusing capacity of the lungs for carbon monoxide; HADS, Hospital Anxiety and Depression Scale; IES-R, Revised impact of Event Scale; PSS, Perceived Stress Scale; SGRQ, St. George Respiratory Questionnaire;  $\dot{V}_E/\dot{V}CO_2$ , ventilatory equivalent for carbon dioxide;  $\dot{V}O_2$ , oxygen uptake.
